# Supplementary material
Source: PubMed Central journal article supplement (PMC5498809)
Supplement: mmc1.pdf [file mmc1.pdf]

YMTHE, Volume 25

## **Supplemental Information**

### **In Vivo Delivery and Therapeutic Effects of a MicroRNA on Colorectal Liver Metastases**

**Go Oshima, Nining Guo, Chunbai He, Melinda E. Stack, Christopher Poon, Abhineet Uppal, Sean C. Wightman, Akash Parekh, Kinga B. Skowron, Mitchell C. Posner, Wenbin Lin, Nikolai N. Khodarev, and Ralph R. Weichselbaum**

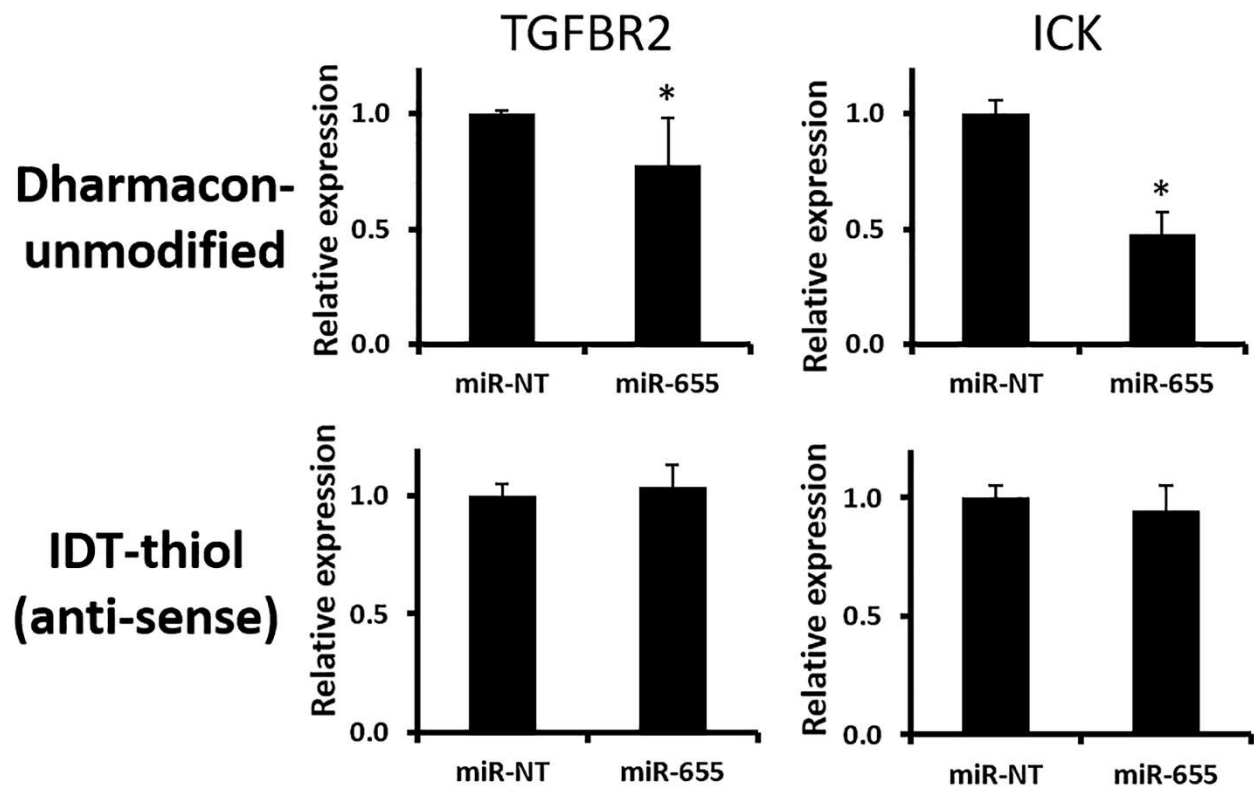

**Figure S1 Functional validation of micro-RNAs modified with thiol on an antisense strand**

Expression of miR-655-3p-targeted genes TGFBFR2 and ICK quantified by qPCR in HCT116L2T cells transfected with each of the tested microRNA mimics (n=6, unpaired *t* test,  $p < 0.05$ , \*).

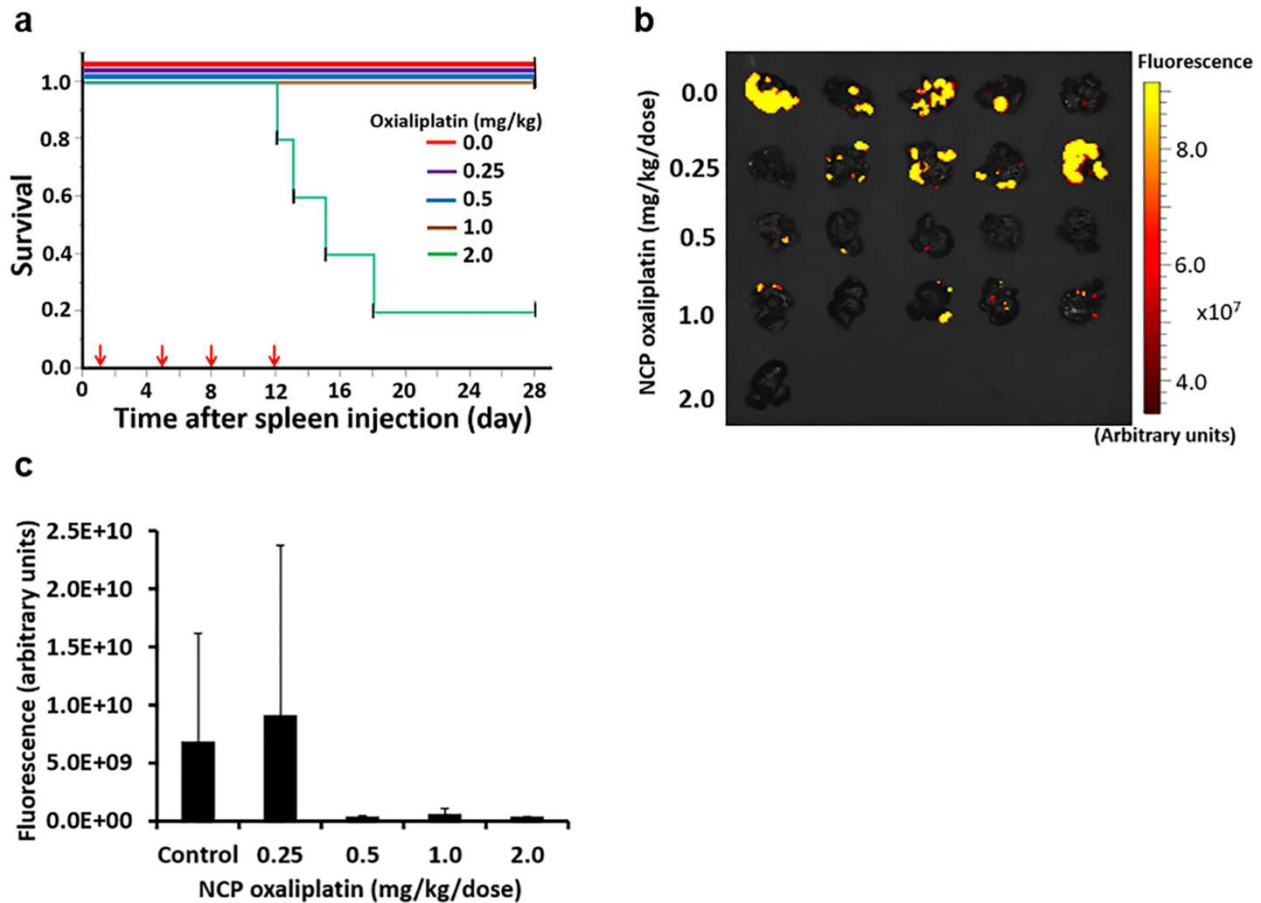

**Figure S2 Toxicity of oxaliplatin-based NCPs in a liver metastases model**

NCPs containing oxaliplatin in concentrations of 0.0, 0.25, 0.5, 1.0, and 2.0 mg/kg were injected intraperitoneally twice a week for 2 weeks in a liver metastases model. (a) Survival curve after NCPs injection. (b) Ex vivo fluorescence imaging of harvested livers with metastases at 4 weeks after cell injection. (c) Quantification of liver tumor burden by ex vivo fluorescence imaging. Data are expressed as means  $\pm$  SD (n = 5).

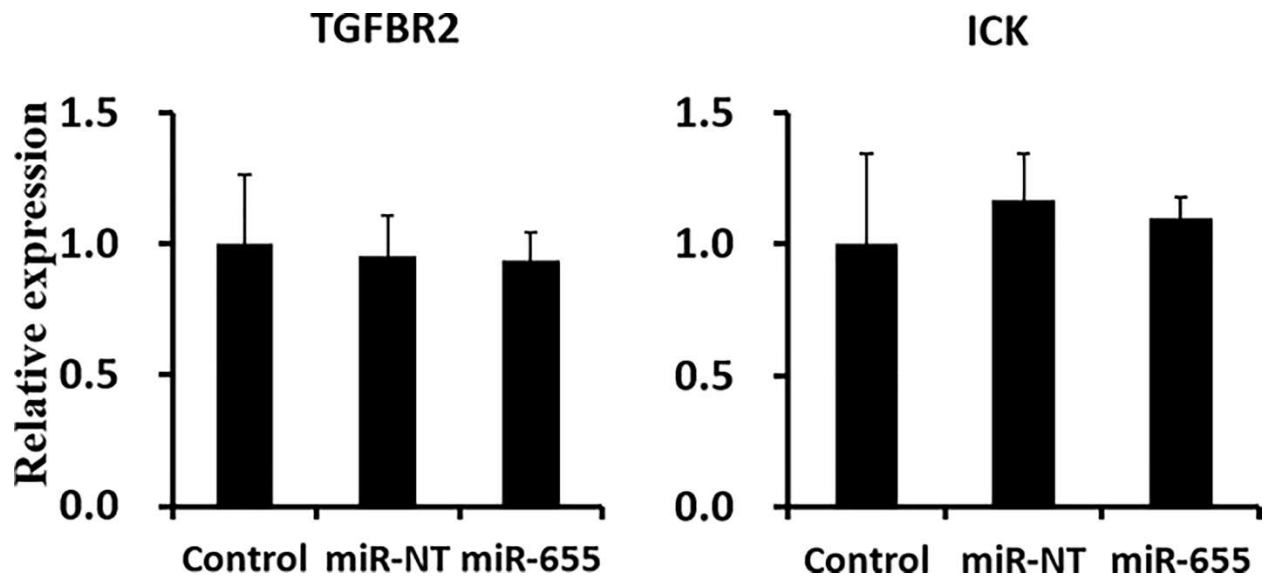

**Figure S3 In vivo gene expression treated with NCP carrying miRNA, RNA extracted from tumor 16 days after the last NCP injection**

|    | KEGG pathway                                                      | p-value  |
|----|-------------------------------------------------------------------|----------|
| 1  | Glycosaminoglycan biosynthesis - chondroitin sulfate (hsa00532)   | 2.31E-19 |
| 2  | Sphingolipid metabolism (hsa00600)                                | 2.39E-05 |
| 3  | Axon guidance (hsa04360)                                          | 4.41E-05 |
| 4  | p53 signaling pathway (hsa04115)                                  | 9.35E-05 |
| 5  | Focal adhesion (hsa04510)                                         | 9.35E-05 |
| 6  | Renal cell carcinoma (hsa05211)                                   | 9.35E-05 |
| 7  | Transcriptional misregulation in cancer (hsa05202)                | 1.85E-04 |
| 8  | Ubiquitin mediated proteolysis (hsa04120)                         | 1.97E-03 |
| 9  | TGF-beta signaling pathway (hsa04350)                             | 1.97E-03 |
| 10 | Glutamatergic synapse (hsa04724)                                  | 1.97E-03 |
| 11 | Inositol phosphate metabolism (hsa00562)                          | 5.03E-03 |
| 12 | Acute myeloid leukemia (hsa05221)                                 | 6.42E-03 |
| 13 | Pathways in cancer (hsa05200)                                     | 7.71E-03 |
| 14 | Prostate cancer (hsa05215)                                        | 9.52E-03 |
| 15 | Gap junction (hsa04540)                                           | 1.02E-02 |
| 16 | Fc gamma R-mediated phagocytosis (hsa04666)                       | 1.34E-02 |
| 17 | MAPK signaling pathway (hsa04010)                                 | 1.52E-02 |
| 18 | Protein processing in endoplasmic reticulum (hsa04141)            | 2.56E-02 |
| 19 | Long-term potentiation (hsa04720)                                 | 3.39E-02 |
| 20 | Bacterial invasion of epithelial cells (hsa05100)                 | 3.39E-02 |
| 21 | Phosphatidylinositol signaling system (hsa04070)                  | 3.52E-02 |
| 22 | Arrhythmogenic right ventricular cardiomyopathy (ARVC) (hsa05412) | 3.52E-02 |
| 23 | Peroxisome (hsa04146)                                             | 3.53E-02 |
| 24 | Chronic myeloid leukemia (hsa05220)                               | 3.53E-02 |
| 25 | Pathogenic Escherichia coli infection (hsa05130)                  | 3.73E-02 |
| 26 | T cell receptor signaling pathway (hsa04660)                      | 3.76E-02 |
| 27 | RNA degradation (hsa03018)                                        | 4.75E-02 |
| 28 | Adherens junction (hsa04520)                                      | 4.75E-02 |
| 29 | Jak-STAT signaling pathway (hsa04630)                             | 4.75E-02 |

**Table S1 Predicted target KEGG pathway by miR-655-3p**

KEGG pathways targeted by miR-655-3p were identified using hypergeometric testing via Diana miRPath v2 ( $p \leq 0.05$ ) (See methods).

| Gene           | Forward                 | Reverse                 |
|----------------|-------------------------|-------------------------|
| humanTGFB2     | GTAGCTCTGATGAGTGCAATGAC | CAGATATGGCAACTCCCAGTG   |
| human ICK      | AGCTCAACCATGCCAATGTAG   | AGTCTCGATGAAAGAAGCCGT   |
| human GAPDH    | TGCACCACCAACTGCTTAGC    | GGCATGGACTGTGGTCATGAG   |
| mouse<br>TGFB2 | CCGCTGCATATCGTCCTGTG    | AGTGGATGGATGGTCCTATTACA |
| mouse ICK      | TTCTTCCACCGGGACTTAAAAC  | CGGAGGTCTTGATCGGATTTCT  |
| mouse GAPDH    | AGGTCGGTGTGAACGGATTTG   | TGTAGACCATGTAGTTGAGGTCA |

**Table S2 Sequences of primers used in qPCR assays**

## **Supplementary Methods**

**microRNA target pathway prediction.** Predicted targets of micro-RNAs were determined using Diana microT-CDS (MicroT threshold 0.6). KEGG pathways targeted by micro-RNAs were identified using hypergeometric testing via Diana miRPath v2 ( $p \leq 0.05$ ). Statistical significance of each KEGG pathway was calculated using Fisher's combined probability method via Diana miRPath v2.
